# Supplementary material for: Phage–antibiotic synergy restores β-lactam efficacy in MDR Klebsiella quasipneumoniae biofilms and suppresses resistance
Source: Research Square preprint supplement (doi:10.21203/rs.3.rs-8098107/v1), 2025-12-22
Supplement: Supplementary file 1 [file 78d71dafb0ed526e55bf0f42.docx]

**Supplementary material**

**Phage–antibiotic synergy restores β-lactam efficacy in MDR *Klebsiella quasipneumoniae* biofilms and suppresses resistance**

**Tinatini Tchatchiashvili1,2*, Mike Marquet1, Ekaterine Gabashvili3, Kamran A. Mirza1,2, Mara Lohde1, Christian Brandt1,6, Ralf Ehricht4,5,6, Mathias W. Pletz1,2,†, Oliwia Makarewicz 1,2,†**

1Institute of Infectious Disease and Infection Control, Jena University Hospital, Friedrich-Schiller-University Jena, 07747 Jena, Germany

2Leipniz Center for Photonics in Infectious Research, 07745 Jena, Germany

3Cluster of Excellence Balance of the Microverse, Friedrich Schiller University Jena, 07745 Jena, Germany

4Leibniz Institute of Photonic Technology, Member of the Research Alliance “Leibniz Health Technologies” and the Leibniz Centre for Photonics in Infection Research (LPI), 07745 Jena, Germany

5Institute of Physical Chemistry, Friedrich Schiller University Jena, 07743 Jena, Germany

6InfectoGnostics Research Campus Jena, Center for Applied Research, 07743 Jena, Germany

*** Correspondence:**

Tinatini Tchatchiashvili

[Tinatini.tchatchiashvili@med.uni-jena.de](mailto:Tinatini.tchatchiashvili@med.uni-jena.de)

†These authors contributed equally to this work as senior authors.


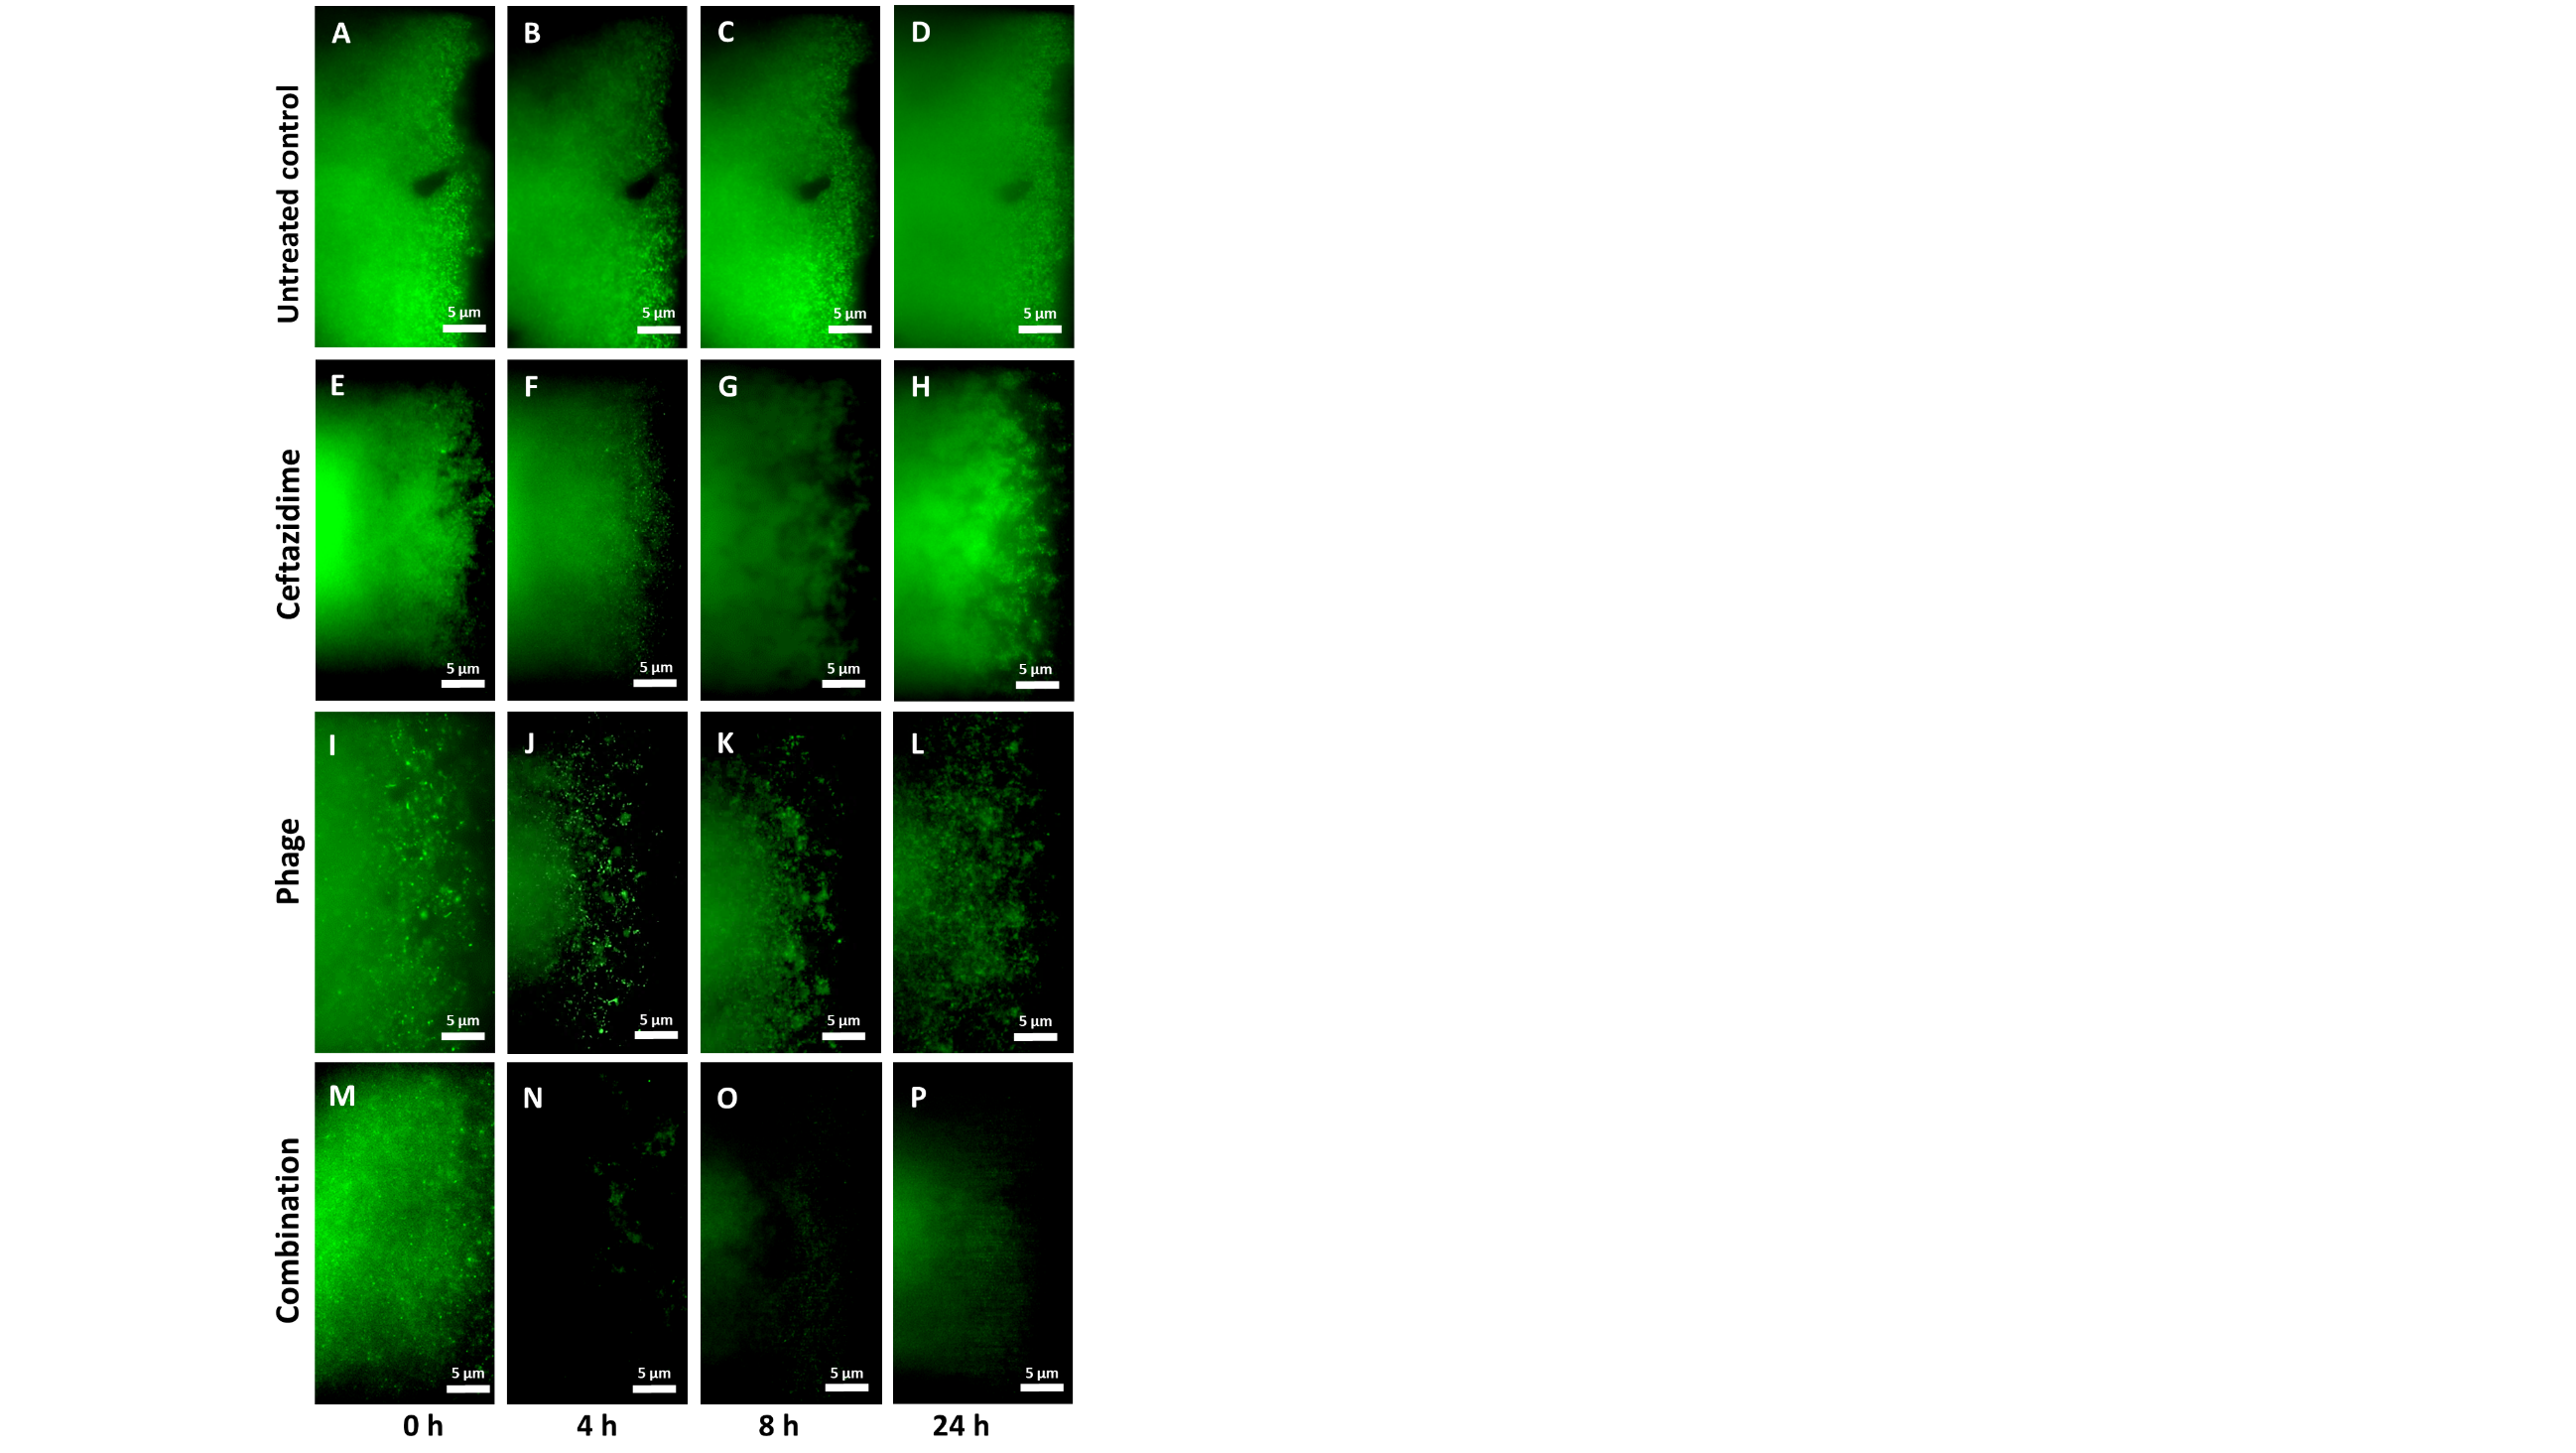


Supplementary Fig. S1. Representative light sheet fluorescence microscopy (LSFM) images of mature *K. quasipneumoniae* ATCC 700603 biofilms over a 24-hour period. (A – D) Untreated control; (E – H) biofilms treated with ceftazidime at 0.25× MIC; (I – L) biofilms treated with phage vB_KpUKJ_2 at 10⁸ PFU/mL; (M – P) biofilms treated with a combination of ceftazidime (0.25× MIC) and phage vB_KpUKJ_2 (10⁸ PFU/mL). Treatment durations, 0 h, 4 h, 8 h and 24 h are indicated. Images show X–Y plane sections of biofilms stained with calcein acetoxymethyl (CAM). Cellular esterases in viable cells convert CAM into fluorescent calcein, causing the entire cell to fluoresce. Images were acquired from three randomly selected fields per sample, with consistent observations across all replicates. Imaging was performed at 62.5× magnification. Scale bars: 5 μm.


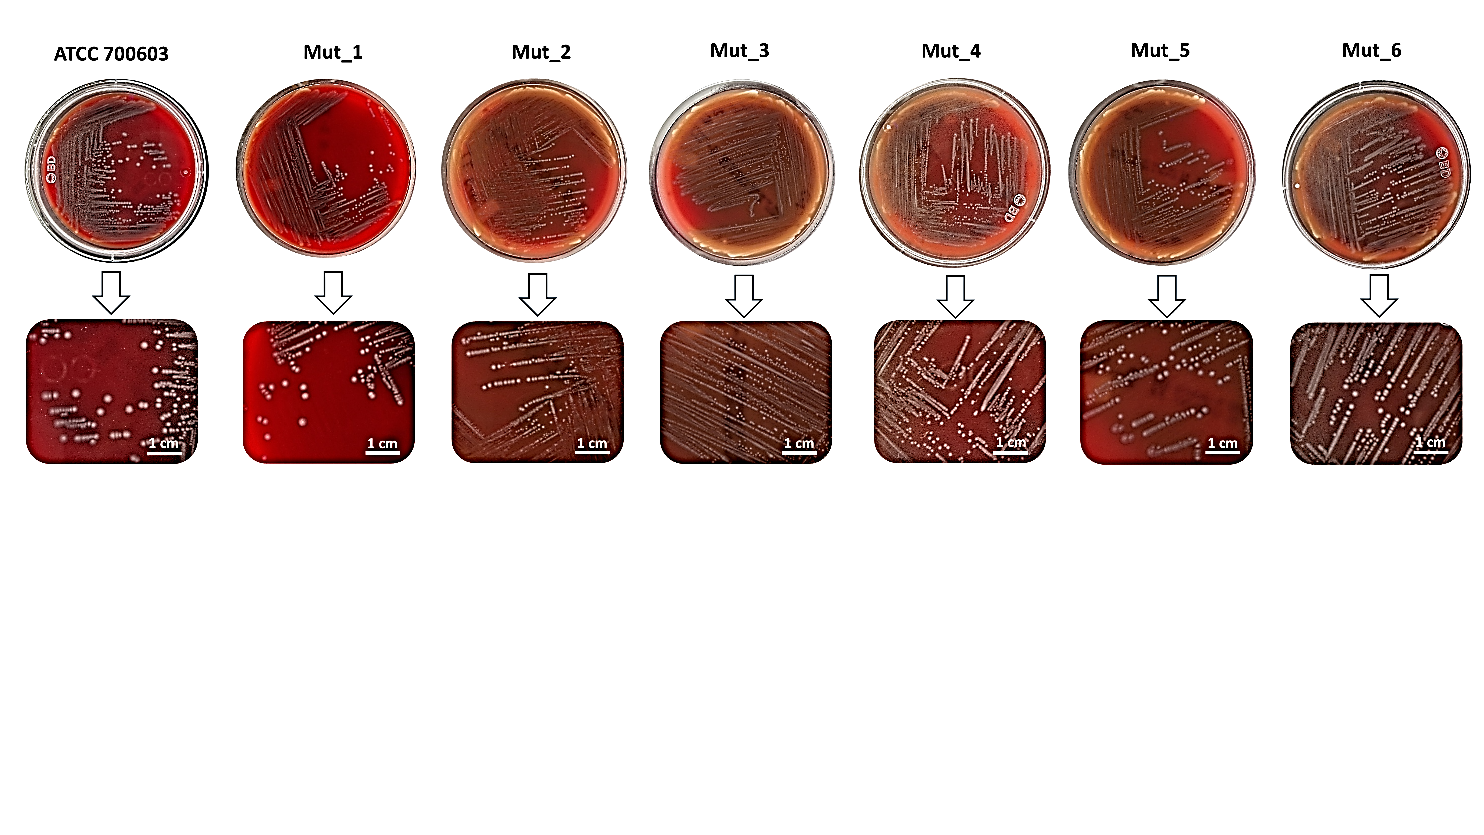


Supplementary Fig. S2 Colony morphology of *K. quasipneumoniae* ATCC 700603 and its phage-resistant mutants grown on blood agar plates. The squared boxes denote regions shown at higher magnification. A 1 cm scale bar is provided for reference.


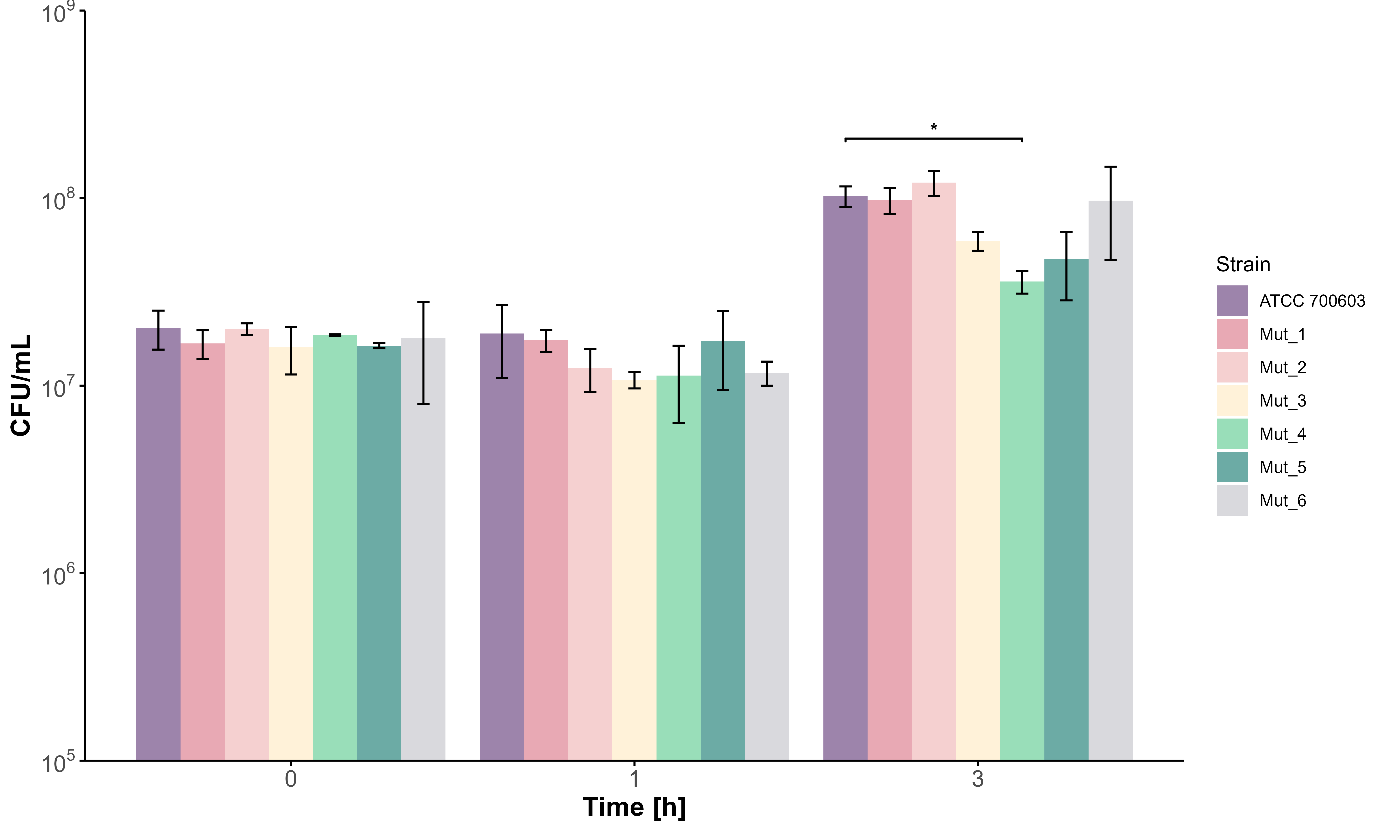


Supplementary Fig. S3 Characteristics of six phage-resistant mutants in comparison with parental *K. quasipneumoniae* ATCC 700603 strain. Bactericidal effect of human serum at 0, 1 and 3 hours determined as CFU/mL. The data are presented as mean ± SD (n = 3). Statistical analyses were performed using one-way ANOVA followed by Tukey’s multiple comparisons test. Significance was assumed at *p*-values <0.05 and is indicated as asterisks: *p <0.05.

Supplementary Table S1 Synergy quantification for planktonic bacteria using the AUC-based *Highest Single Agent* (HSA) synergy model, calculating the SHSA synergy scores (*S*HSA)

|  | **Phage 104 PFU/mL** | **Phage 106 PFU/mL** | **Phage 108 PFU/mL** |
| --- | --- | --- | --- |
| **CAZ 2.0x MIC** | -0.04 | -0.03 | -0.03 |
| **CAZ 1.0x MIC** | -0.05 | -0.02 | -0.01 |
| **CAZ 0.50x MIC** | -0.07 | -0.04 | 0.05 |
| **CAZ 0.25x MIC** | -0.16 | -0.22 | 0.29 |

Supplementary Table S2 CAZ MICs of phage-resistant mutants

| **Mutant ID** | **MIC (mg/L)** | **EUCAST interpretation** |
| --- | --- | --- |
| Mutant 1 | 64 | R |
| Mutant 2 | 32 | R |
| Mutant 3 | 64 | R |
| Mutant 4 | 32 | R |
| Mutant 5 | 64 | R |
| Mutant 6 | 64 | R |

EUCAST: European Committee on Antimicrobial Susceptibility Testing
